# Supplementary material for: Sequestration of Intestinal Acidic Toxins by Cationic Resin Attenuates Pancreatic Cancer Progression through Promoting Autophagic Flux for YAP Degradation
Source: MDPI journal article supplement (doi:10.3390/cancers14061407), 2022-03-10

Figure S2F

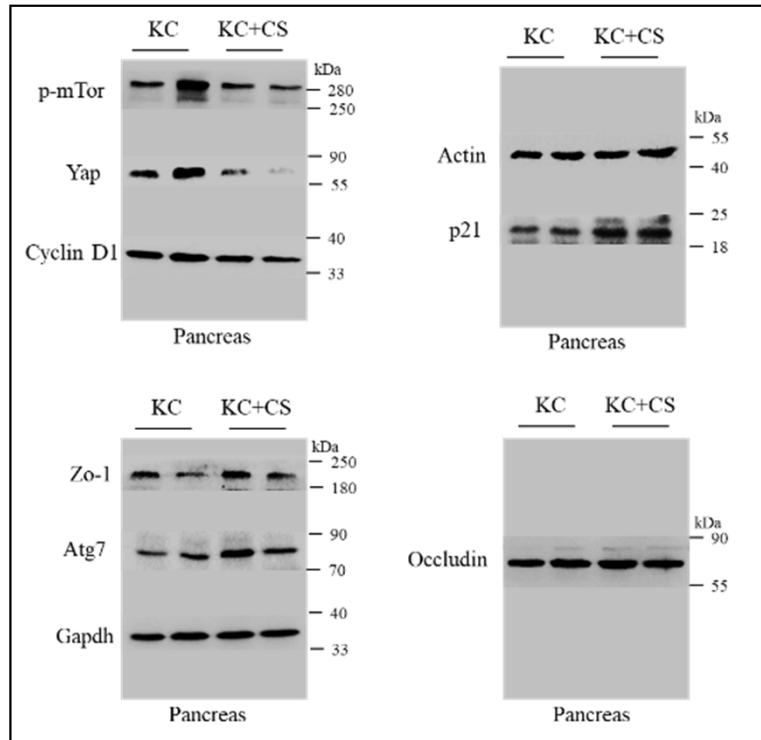

Figure S3E

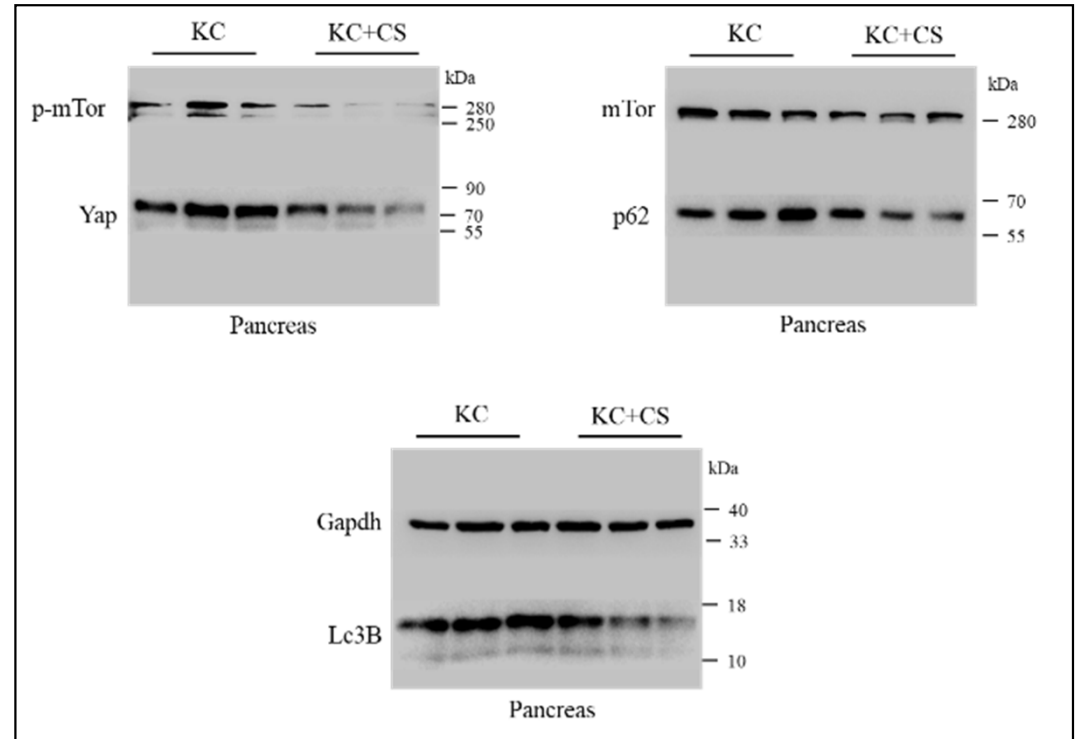

Figure S4C

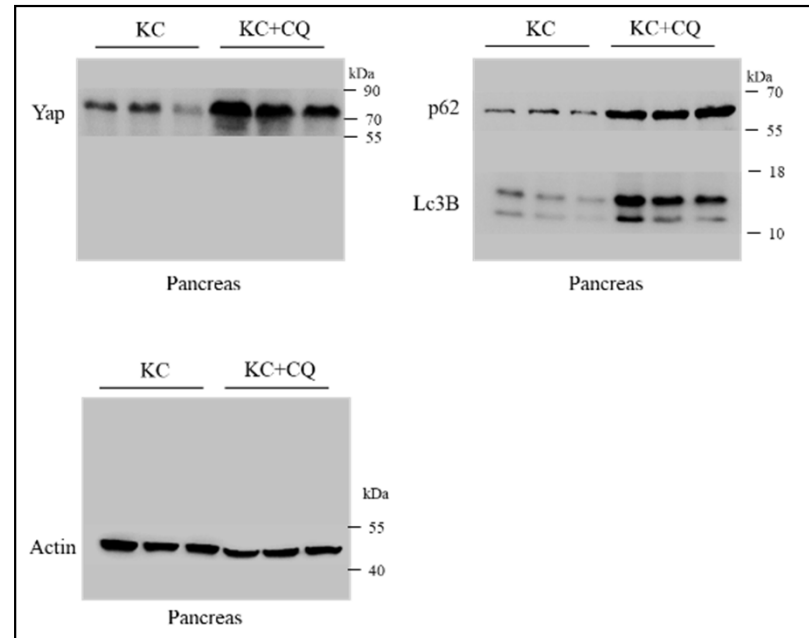

Figure S6A

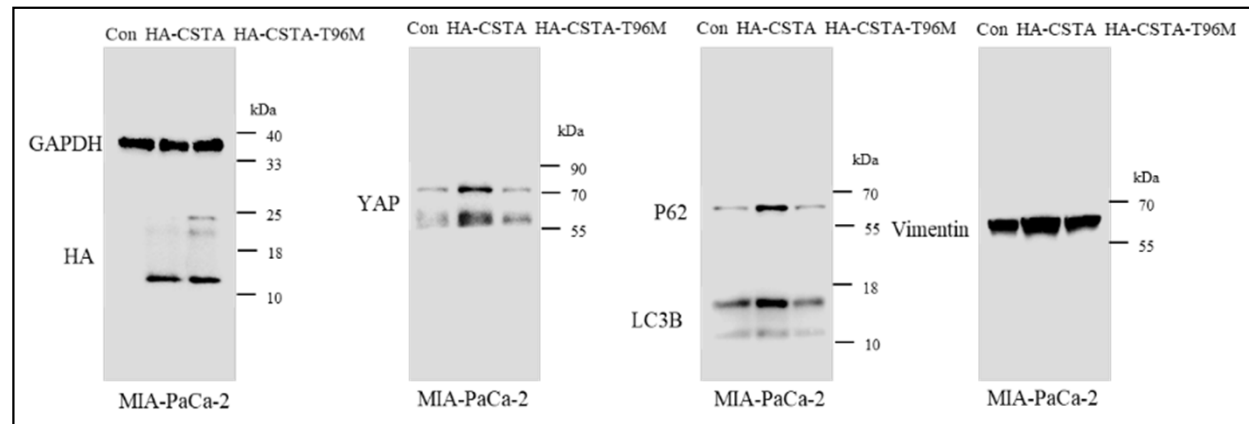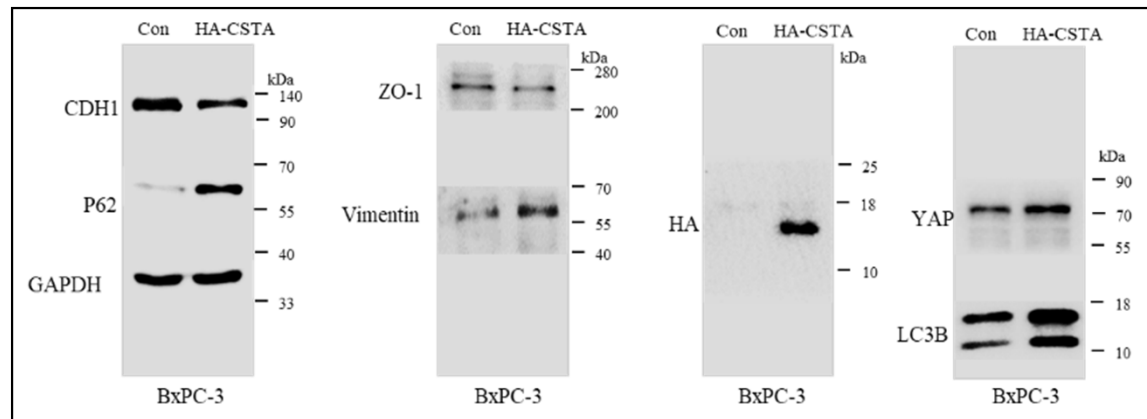

Figure S6C

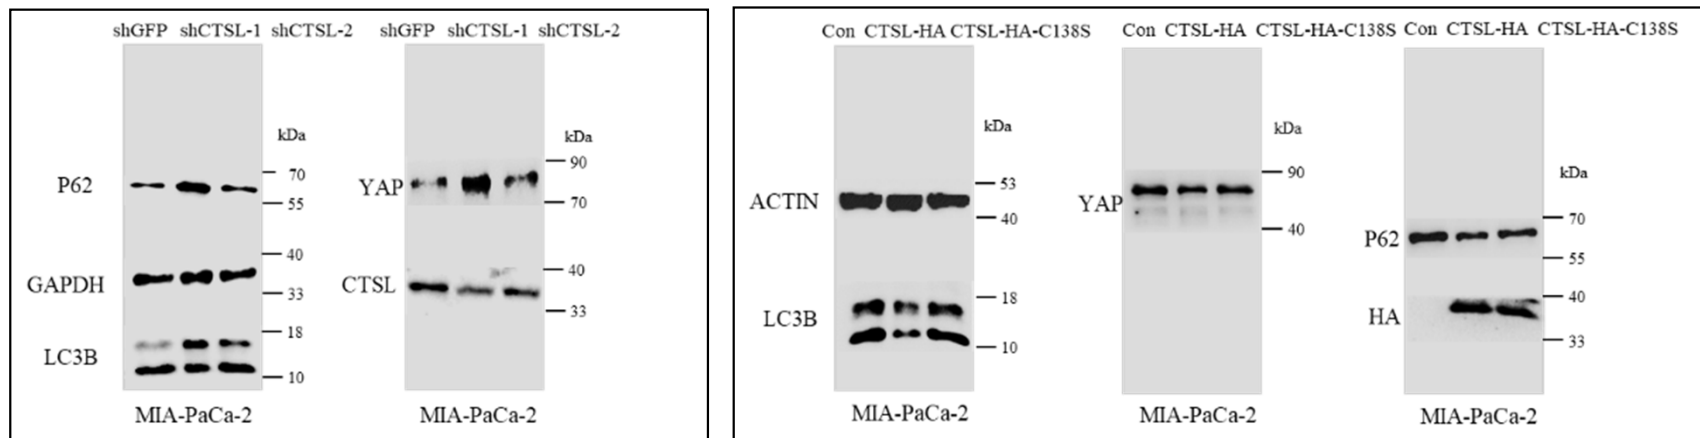

Figure S7A

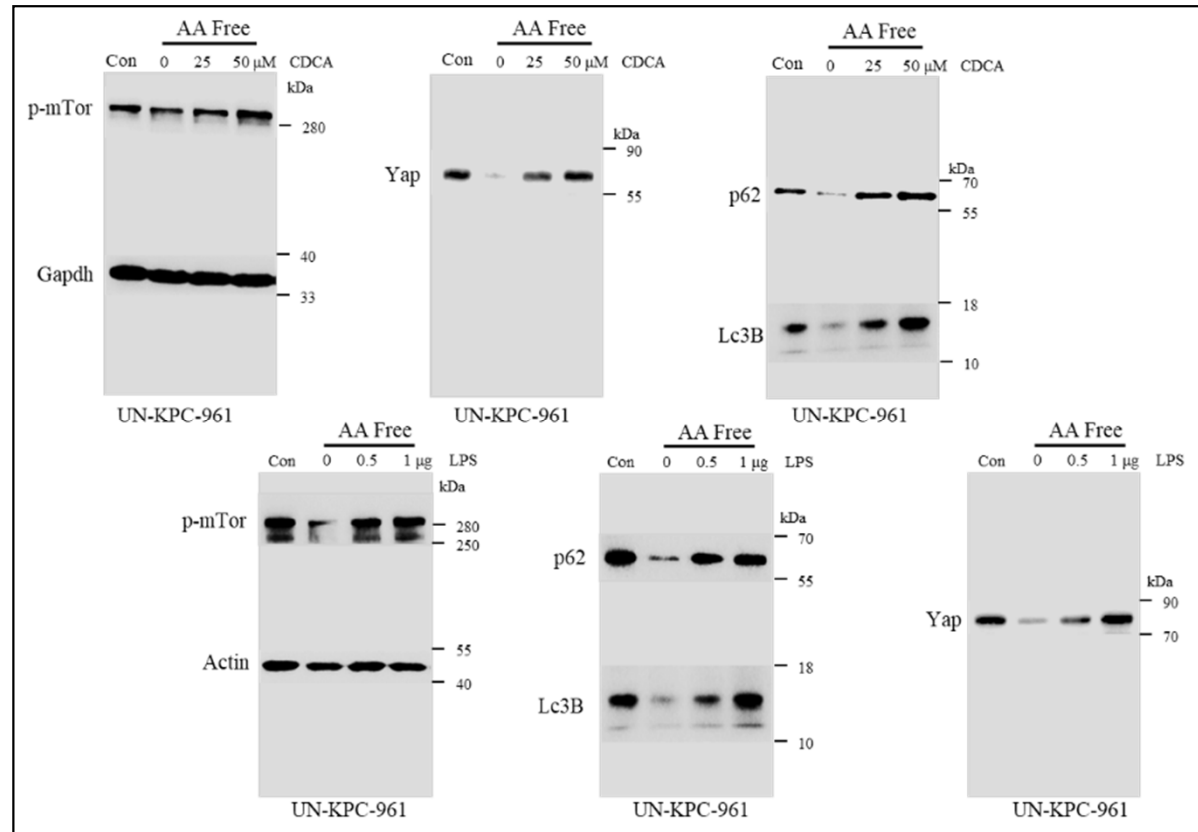

Figure S7B

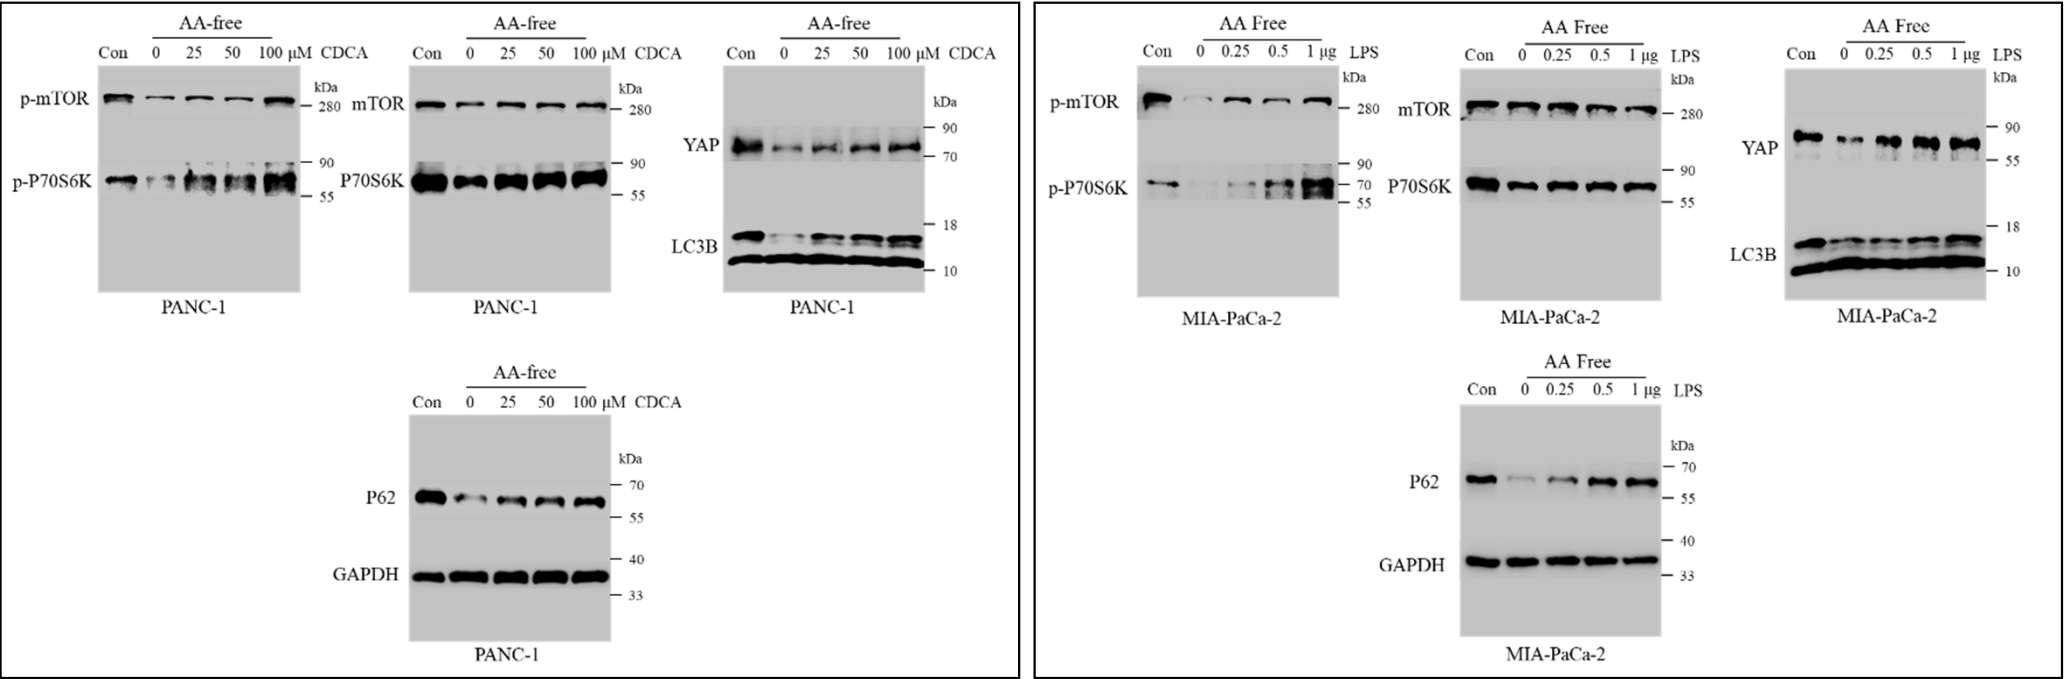

Figure S7D

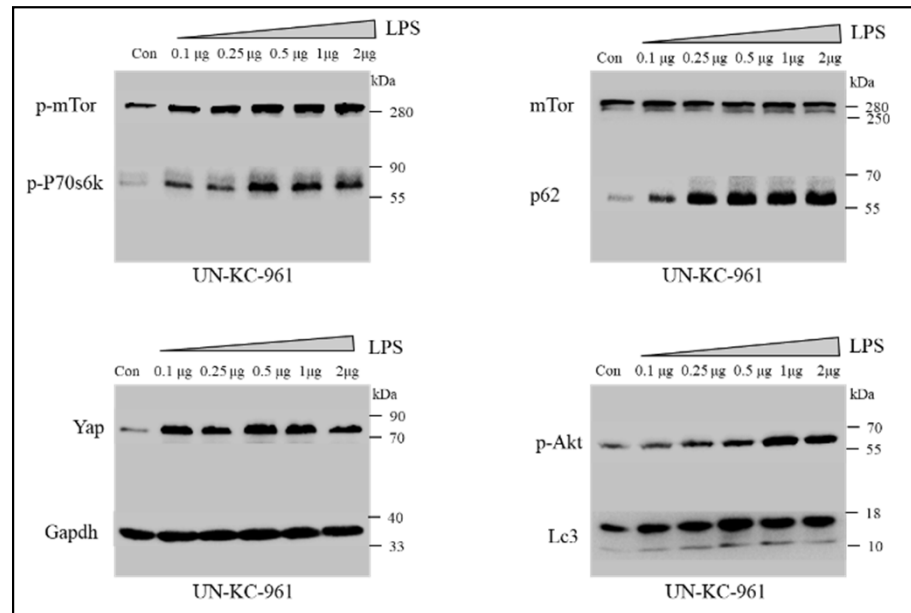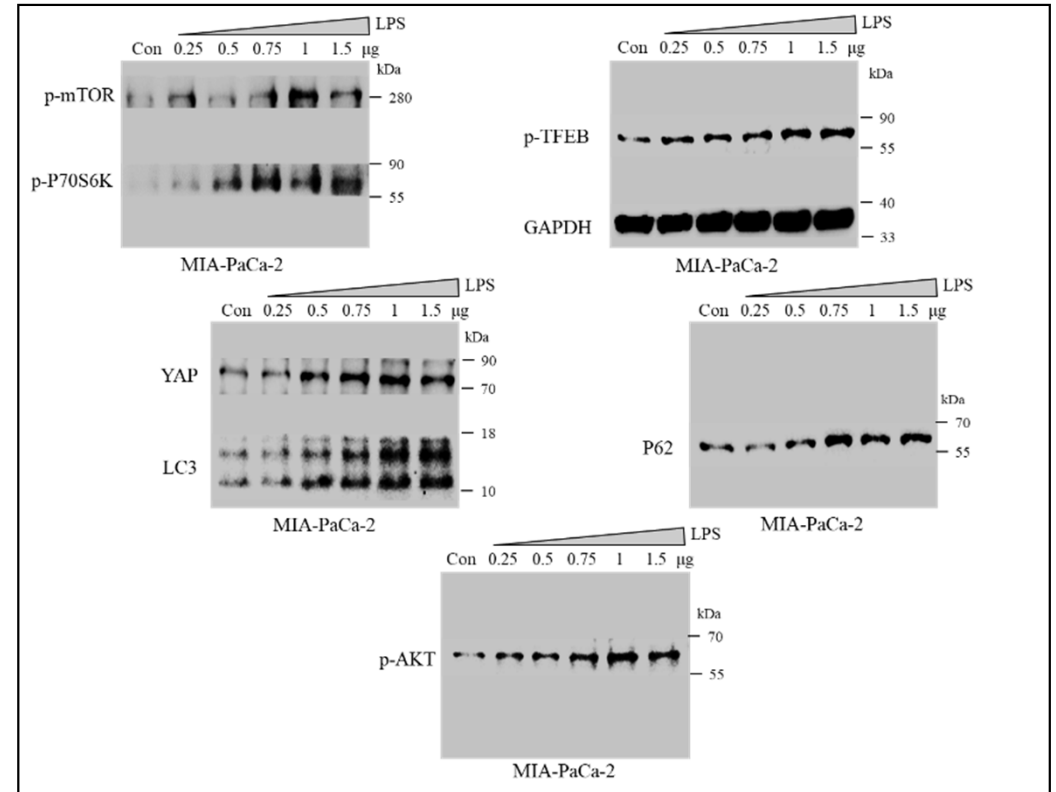

Figure S7E

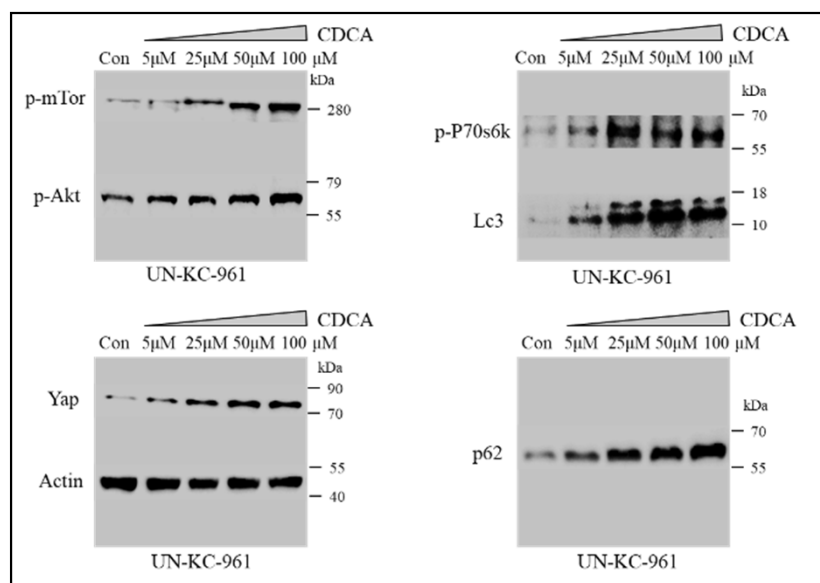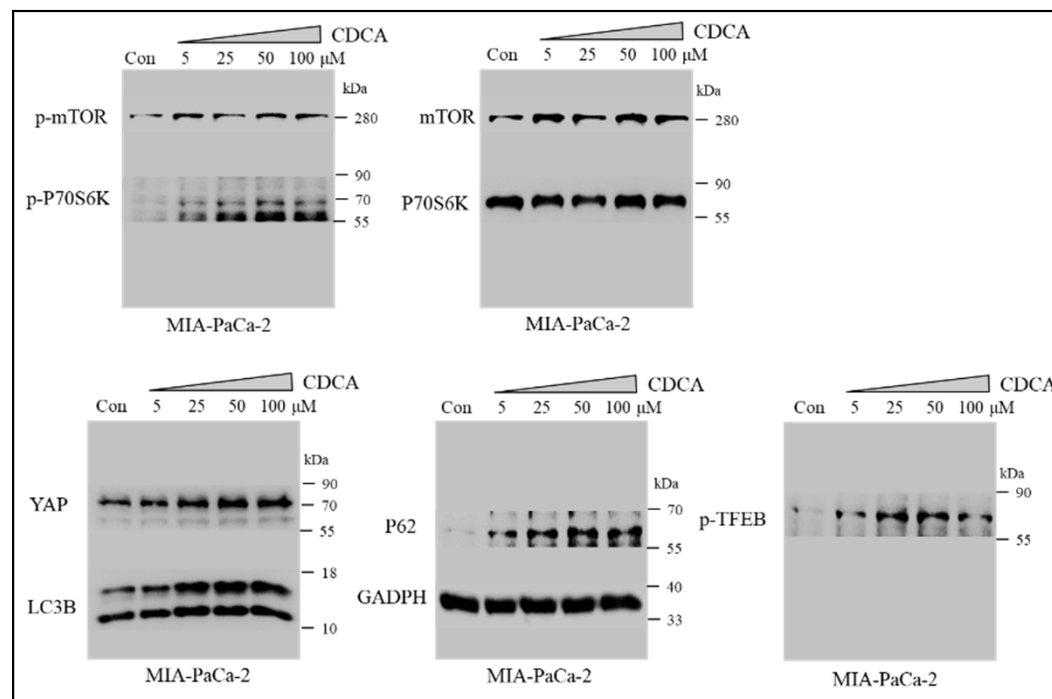

Figure S7F

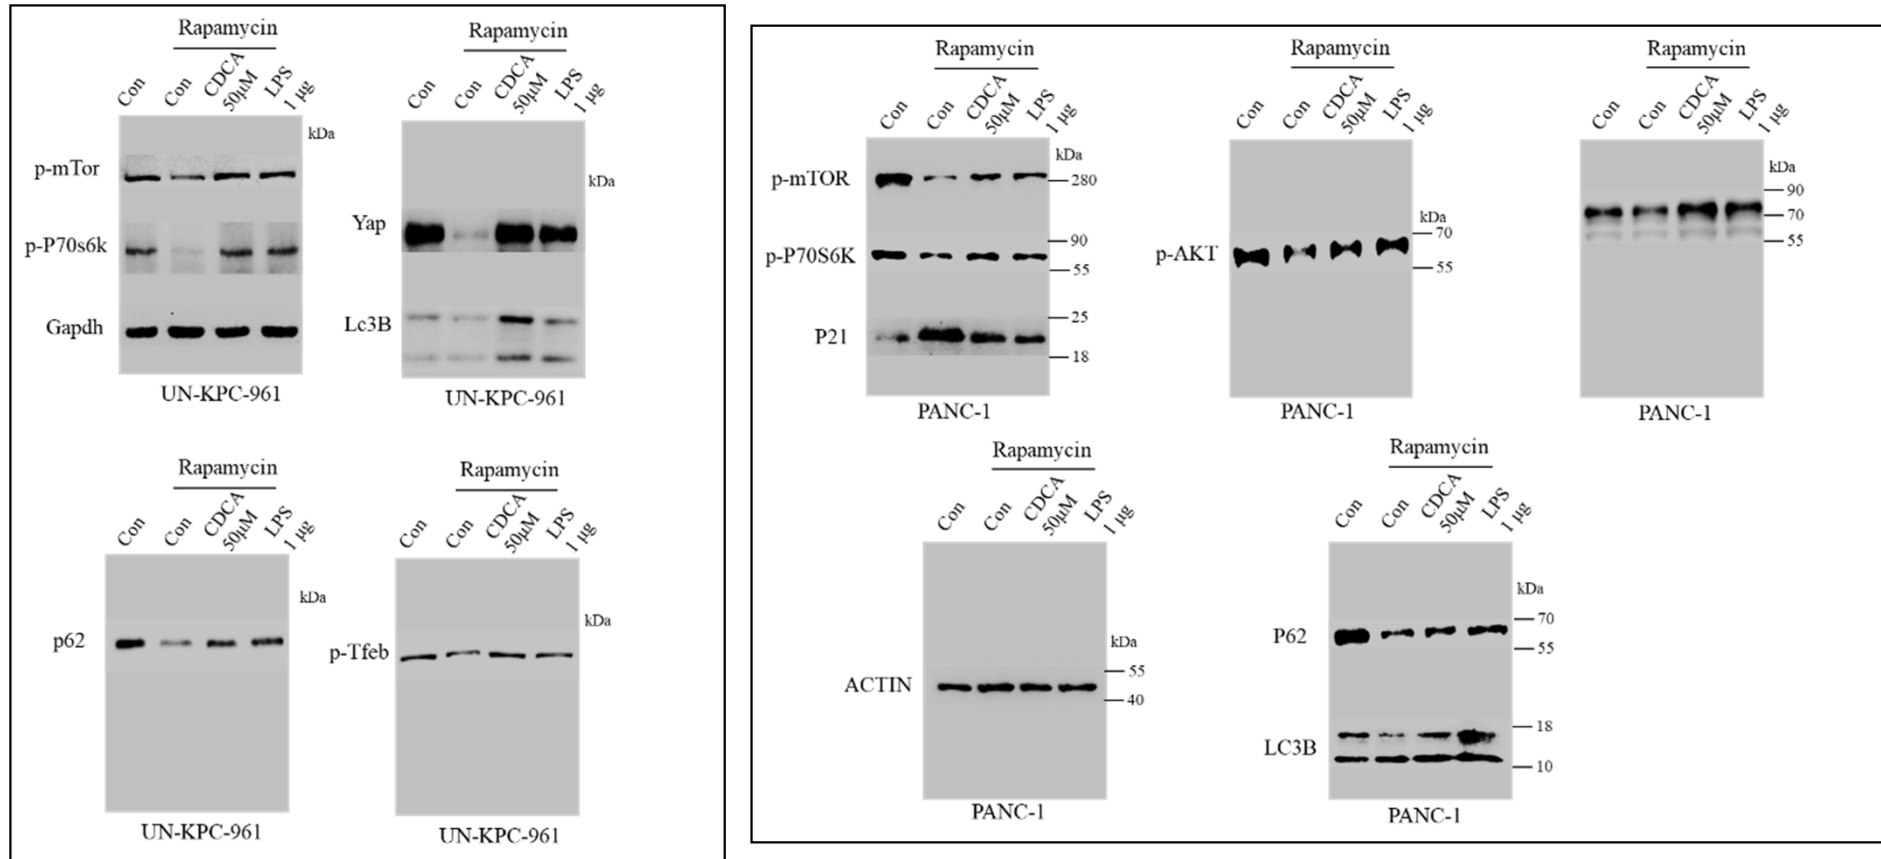

Figure S8A

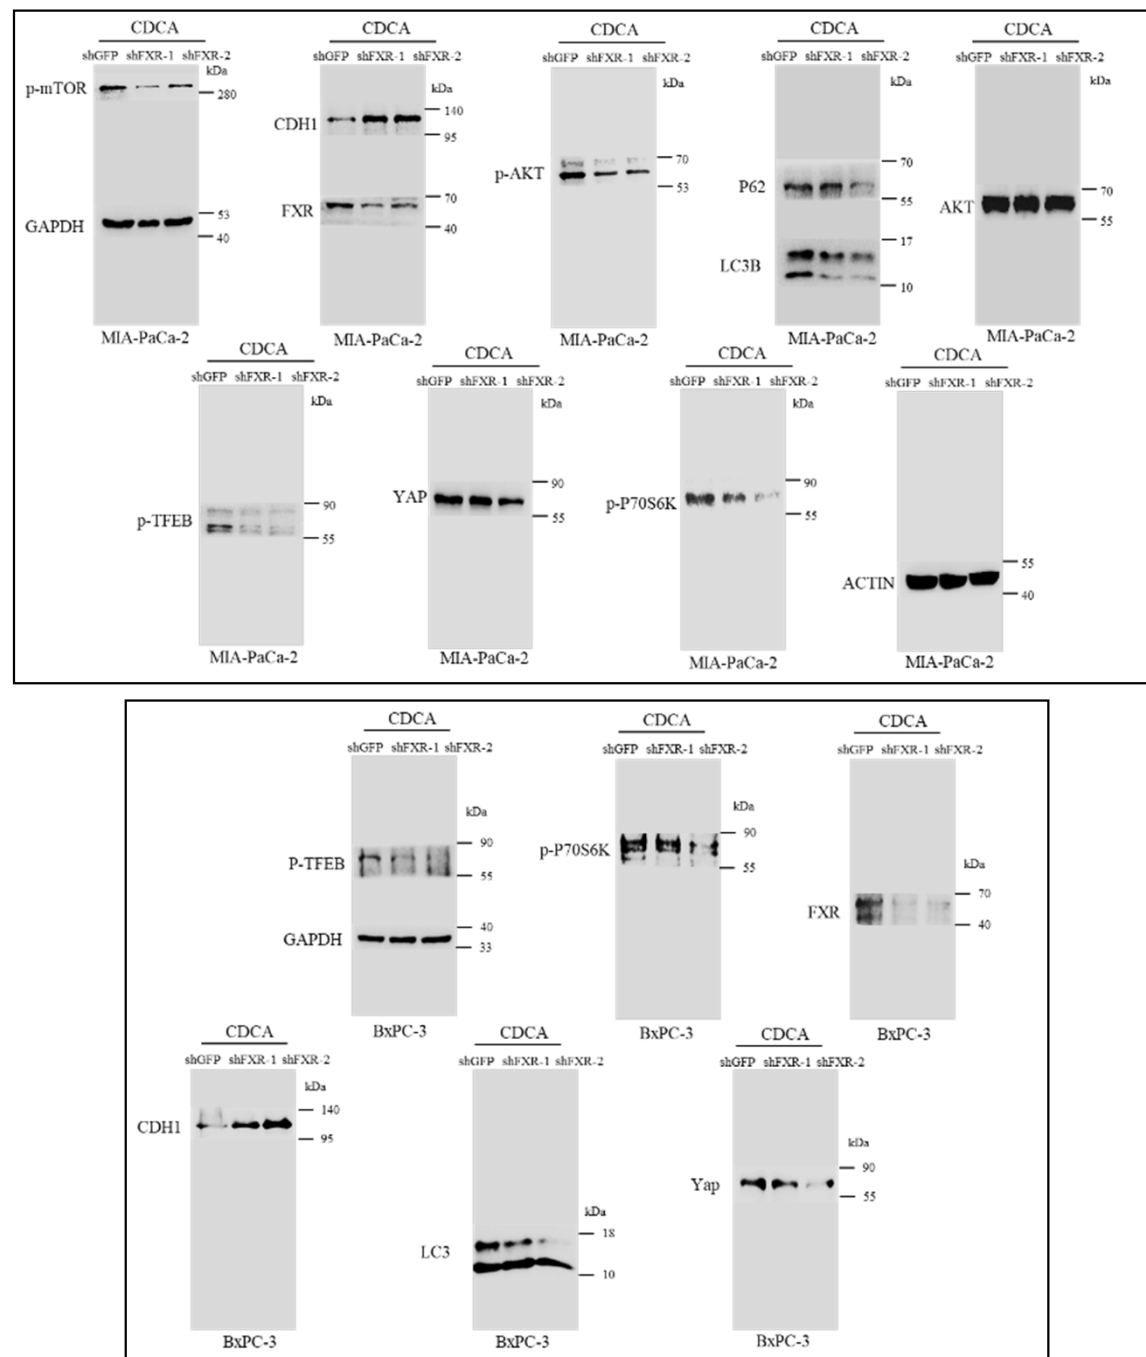



Figure S8B

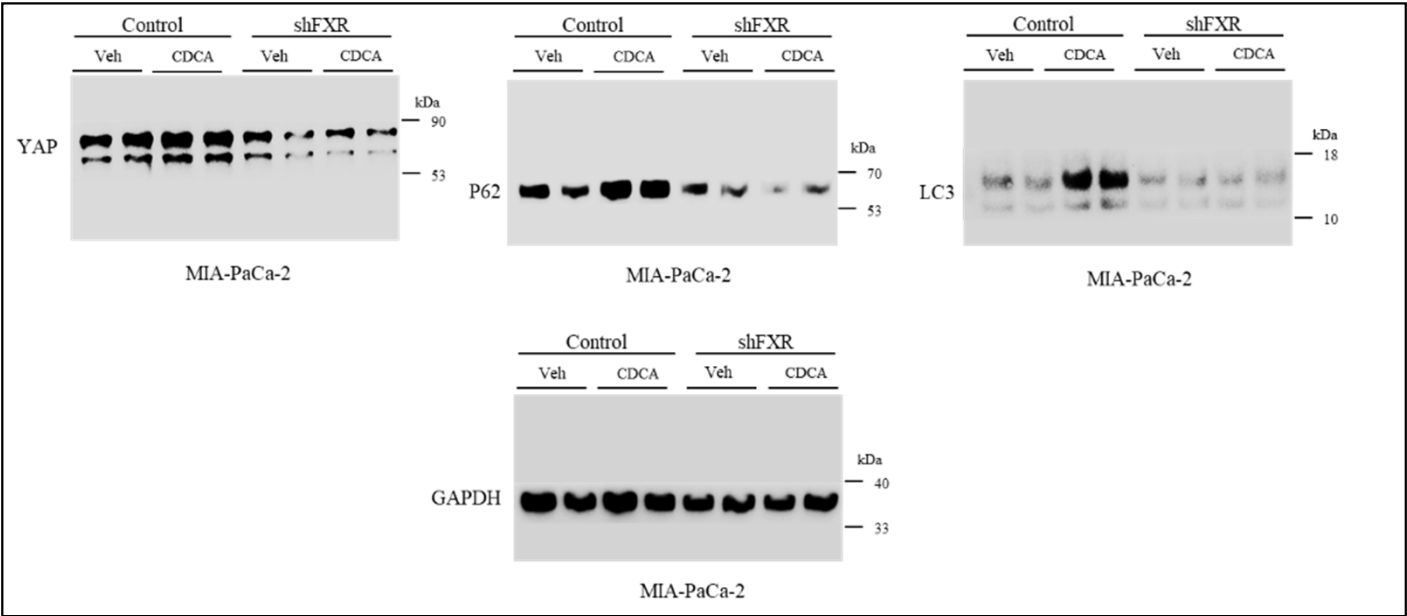

Figure S8C

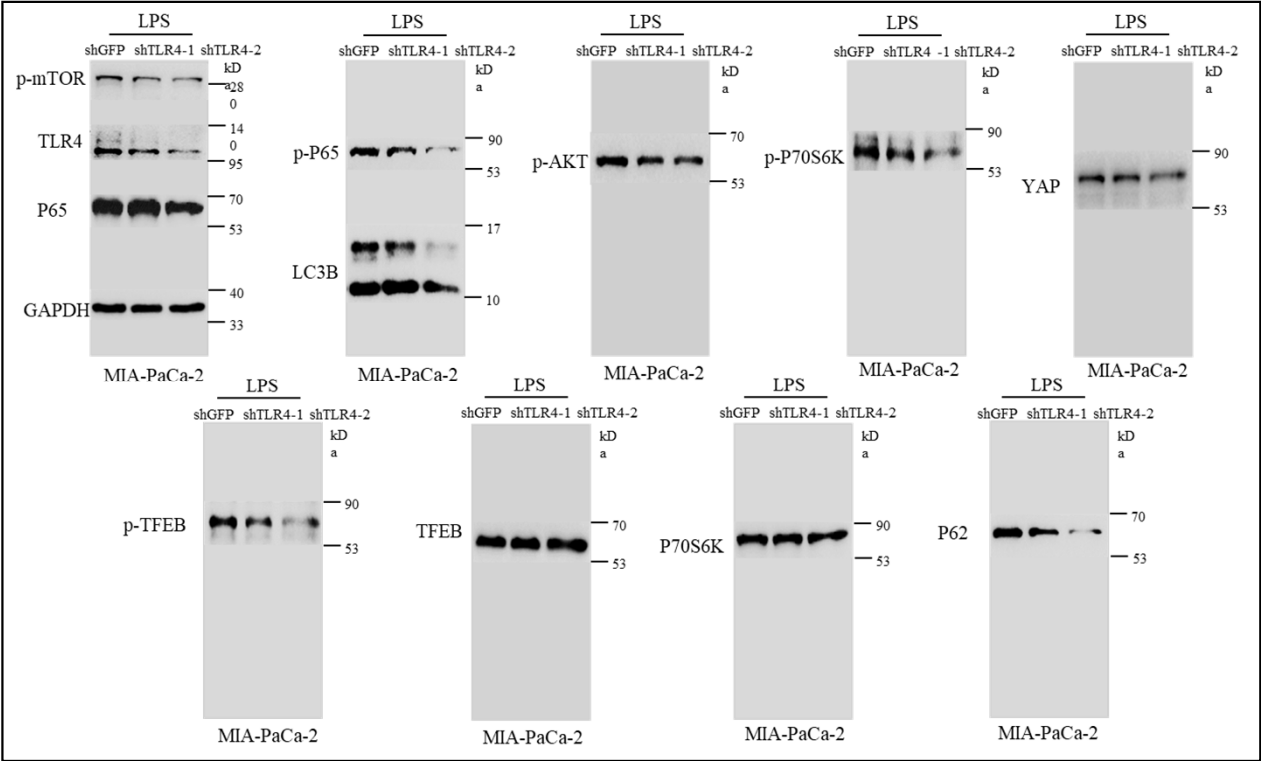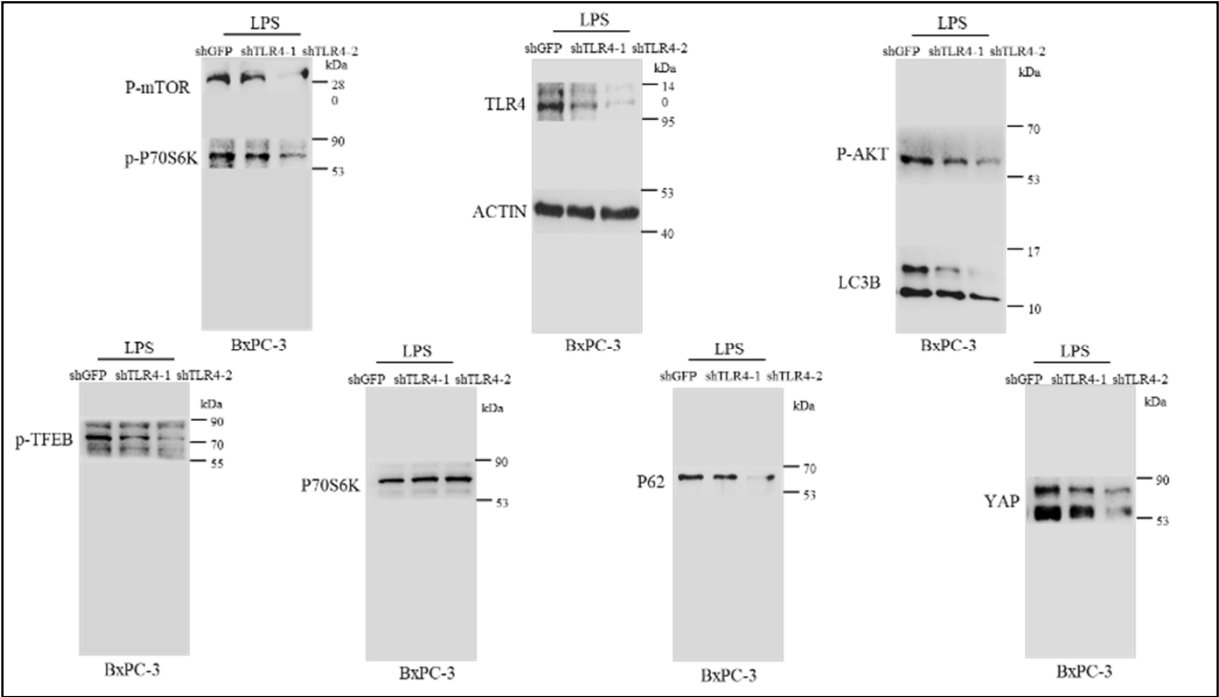

Figure S8D

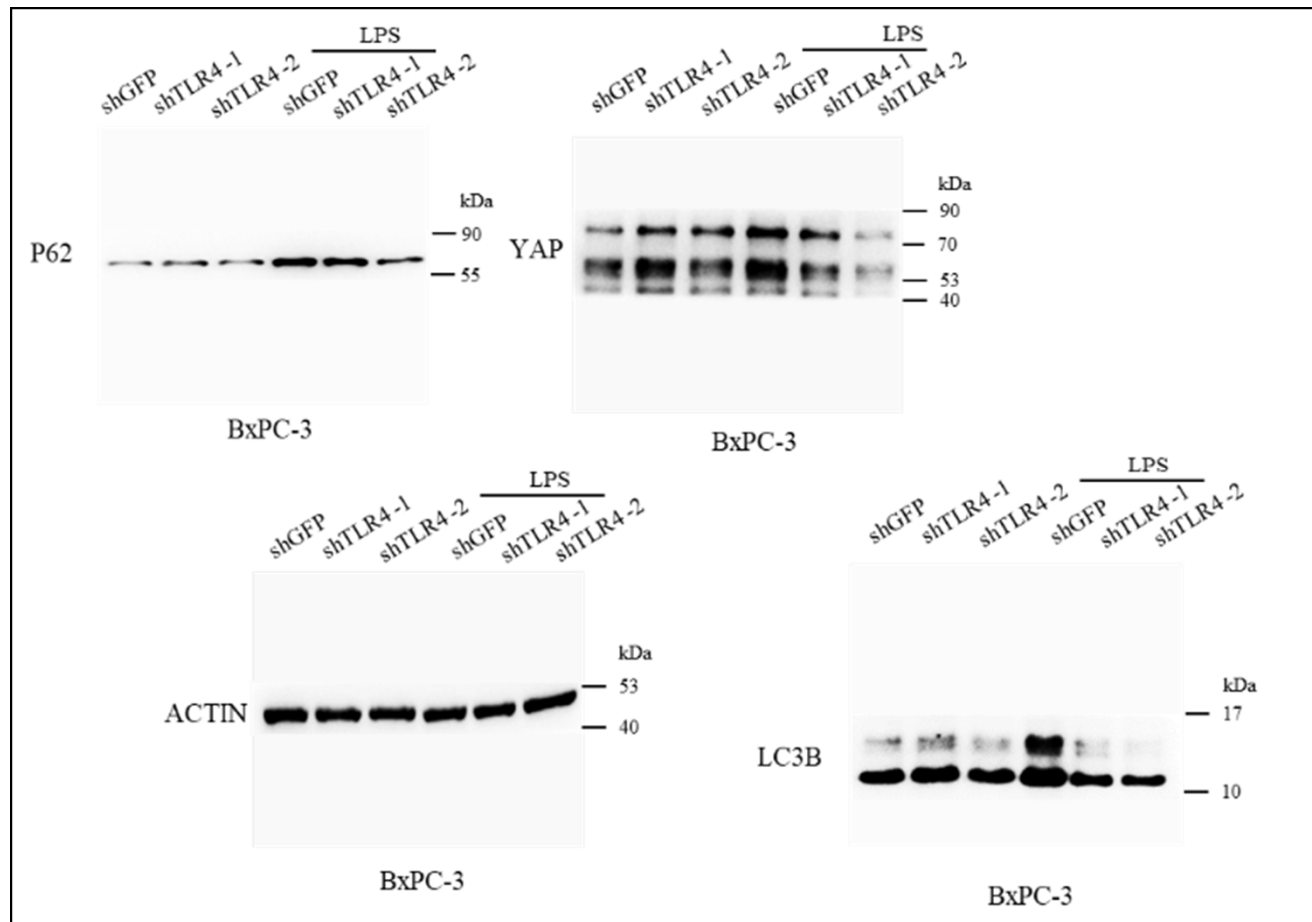

## Supplementary Figure S3A

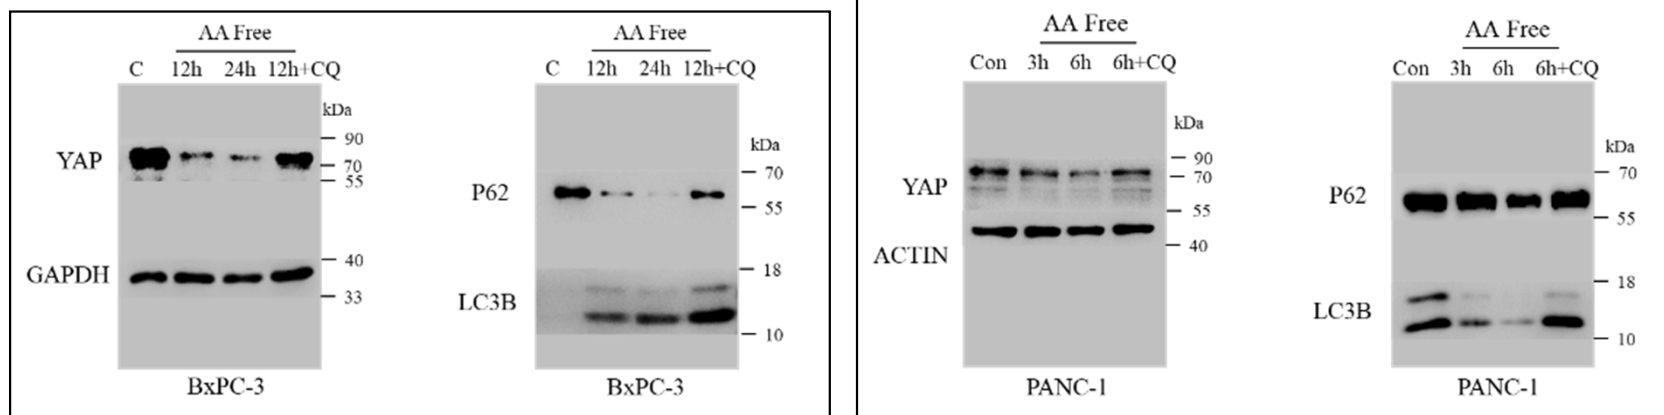

## Supplementary Figure S3C

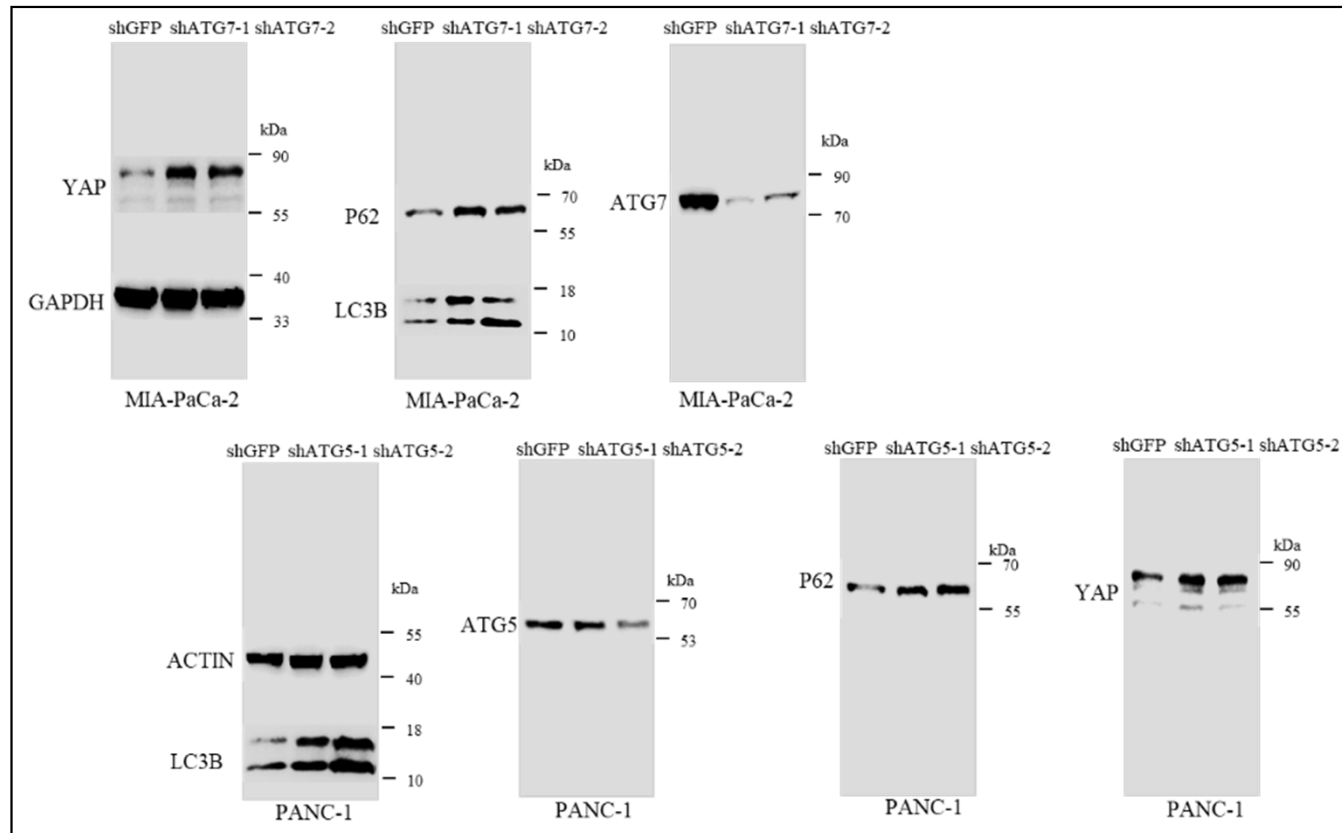

## Supplementary Figure S6B

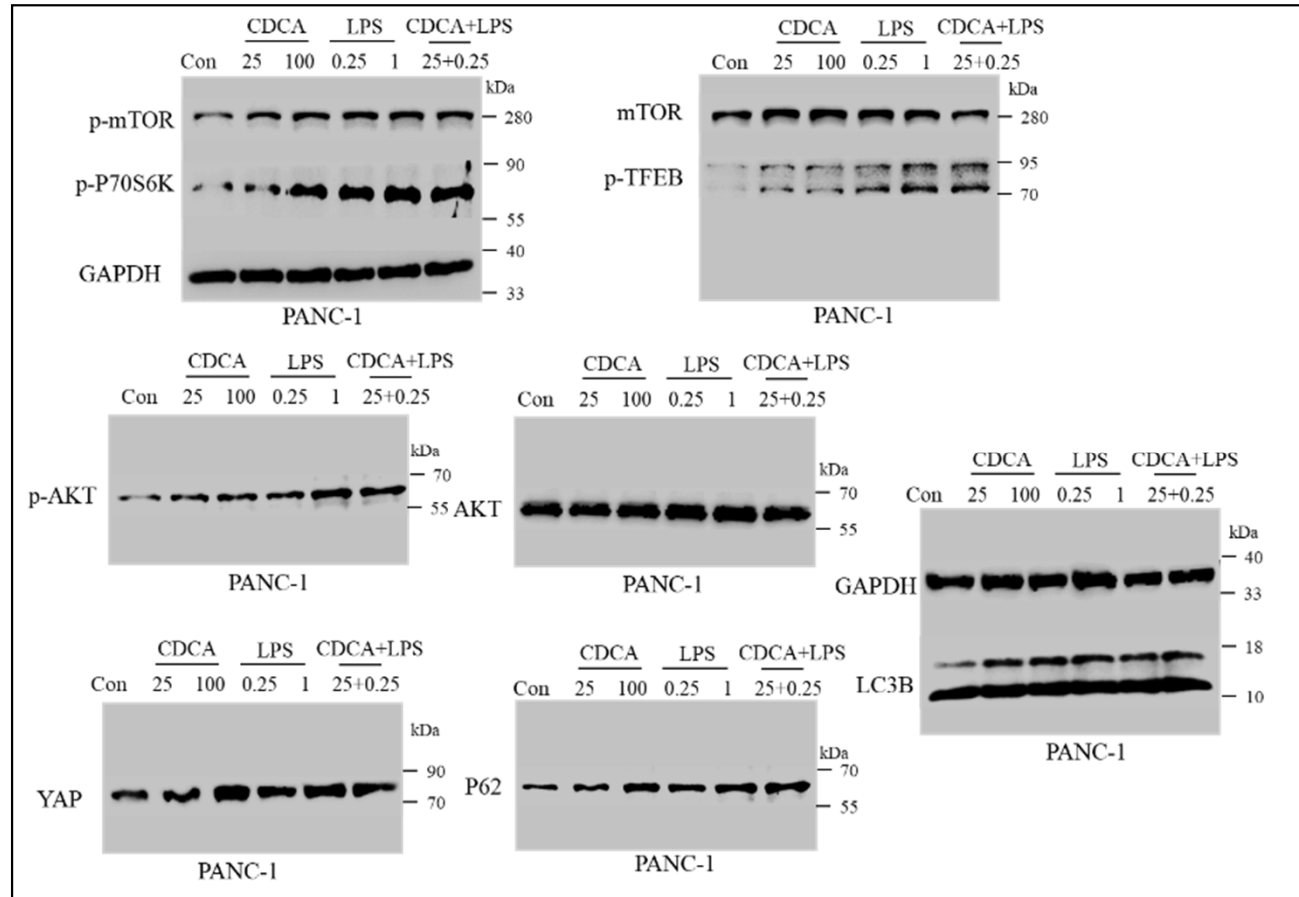

Supplement: s1 [file s1]
